## **Correction: Delayed Goblet Cell Hyperplasia, Acetylcholine Receptor Expression, and Worm Expulsion in SMC-Specific IL-4R $\alpha$ -Deficient Mice**

William G. C. Horsnell, Antony J. Cutler, J. Claire Hoving, Helen Mearns, Elmarie Myburgh, Berenice Arendse, Fred D. Finkelman, Gary K. Owens, Dave Erle, Frank Brombacher

doi: 10.1371/journal.ppat.0030001

In *PLoS Pathogens*, volume 3, issue 1:

The third author's name was incorrectly listed as Claire J. Hoving. The correct name is J. Claire Hoving.

This correction note may be found online at doi:10.1371/journal.ppat.0030037.

Published April 27, 2007.

Citation: (2007) Correction: Delayed goblet cell hyperplasia, acetylcholine receptor expression, and worm expulsion in SMC-specific IL-4R $\alpha$ -deficient mice. *PLoS Pathog* 3(4): e37. doi:10.1371/journal.ppat.0030037
